# Supplementary material for: Exploring the Ecological Preferences and Essential Oil Variability in Wild-Growing Populations of the Endangered Local Greek Endemic Thymus holosericeus (Lamiaceae)
Source: MDPI journal article supplement (doi:10.3390/plants12020348), 2023-01-11
Supplement: s1 [file s1]

## Supplementary Material

**Table S1:** Literature values of the main compounds and observed values of  $^1\text{H}$ -NMR in the essential oils of *Thymus holosericeus* from three Ionian Islands, Greece (TH-Z: Zakynthos; TH-C: Cephalonia, TH-L: Lefkada)

| Literature values ( $\delta$ ) |             |                |                |               |                      |       |
|--------------------------------|-------------|----------------|----------------|---------------|----------------------|-------|
| Linalool [48]                  |             | Carvacrol [49] |                | Geraniol [50] |                      |       |
| H                              | C           | H              | C              | H             | C                    |       |
| 1                              | 5.33 d (2H) | 120.17         | -              | 153.6         | 4.154 d (J=6.9Hz) 1H | 59.5  |
| 2                              | 5.91 t 1H   | 145.25         | -              | 126.9         | 5.41 m 1H            | 123.4 |
| 3                              | -           | 75.68          | 7.08 d (J=5Hz) | 130.9         | -                    | 139.9 |
| 4                              | 1.37 2H     | 43.87          | 6.78 d (J=5Hz) | 118.8         | o.s. 1.98-2.16       | 26.5  |
| 5                              | 2.01q 2H    | 22.52          | -              | 148.5         | o.s. 1.98-2.16       | 39.6  |
| 6                              | 5.19 t 1H   | 108.65         | 6.70 s 1H      | 113.0         | 5.09 m 1H            | 131.9 |
| 7                              | -           | 131.96         | 2.26 s 3H      | 15.4          | -                    | 124.0 |
| 8                              | 1.63 3H     | 17.53          | 2.86 m 3H      | 33.7          | 1.68 s 3H            | 25.8  |
| 9                              | 1.76 3H     | 24.95          | 1.26 d (J=5Hz) | 24.1          | 1.60 s 3H            | 16.4  |
| 10                             | 0.90 3H     | 29.8           | 1.26 d (J=5Hz) | 24.1          | 1.68 s 3H            | 17.8  |

| Observed values ( $\delta$ ) |       |                     |       |                     |       |
|------------------------------|-------|---------------------|-------|---------------------|-------|
| TH-Z                         |       | TH-C                |       | TH-L                |       |
|                              |       | 7.08 d (J=5Hz)      | 130.9 |                     |       |
|                              |       | 6.78 d (J=5Hz)      | 118.8 |                     |       |
|                              |       | 6.70 s 1H           | 113.0 |                     |       |
| 5.91 t 1H                    | 145.3 | 5.91 t 1H           | 145.3 | 5.91 t 1H           | 145.2 |
|                              |       | 5.41 m 1H           | 123.4 | 5.41 m 1H           | 123.4 |
| 5.33 d 2H                    | 120.2 | 5.33 d (2H)         | 120.1 | 5.33 d 2H           | 120.2 |
| 5.19 t 1H                    | 108.8 | 5.19 t 1H           | 108.6 | 5.19 t 1H           | 108.7 |
|                              |       | 5.10 m 1H           | 131.9 | 5.10 m 1H           | 131.9 |
|                              |       | 4.14 d (J=6.9Hz) 1H | 59.3  | 4.14 d (J=6.9Hz) 1H | 59.3  |
|                              |       | 2.86 m 3H           | 33.7  |                     |       |
|                              |       | 2.26 s 3H           | 15.4  |                     |       |
|                              |       | o.s. 1.98-2.16 4H   | 39.8  | o.s. 1.98-2.16 4H   | 39.7  |
|                              |       |                     | 25.4  |                     | 25.3  |
| 2.01q 2H                     | 22.4  | 2.01q 2H            | 22.6  | 2.01q 2H            | 22.5  |
| 1.76 3H                      | 24.8  | 1.76 3H             | 24.9  | 1.76 3H             | 25.0  |
|                              |       | 1.68 s 6H           | 25.7  | 1.68 s 6H           | 25.9  |
|                              |       |                     | 17.9  |                     | 18.0  |
| 1.63 s 3H                    | 17.4  | 1.63 3H             | 17.5  | 1.63 3H             | 17.5  |
|                              |       | 1.60 s 3H           | 16.4  | 1.60 s 3H           | 16.3  |
| 1.37 2H                      | 44.0  | 1.37 2H             | 43.9  | 1.37 2H             | 43.8  |
|                              |       | 1.26 d (J=5Hz) 6H   | 24.1  |                     |       |
| 0.91 s 3H                    | 29.7  | 0.90 3H             | 30.0  | 0.90 3H             | 29.8  |

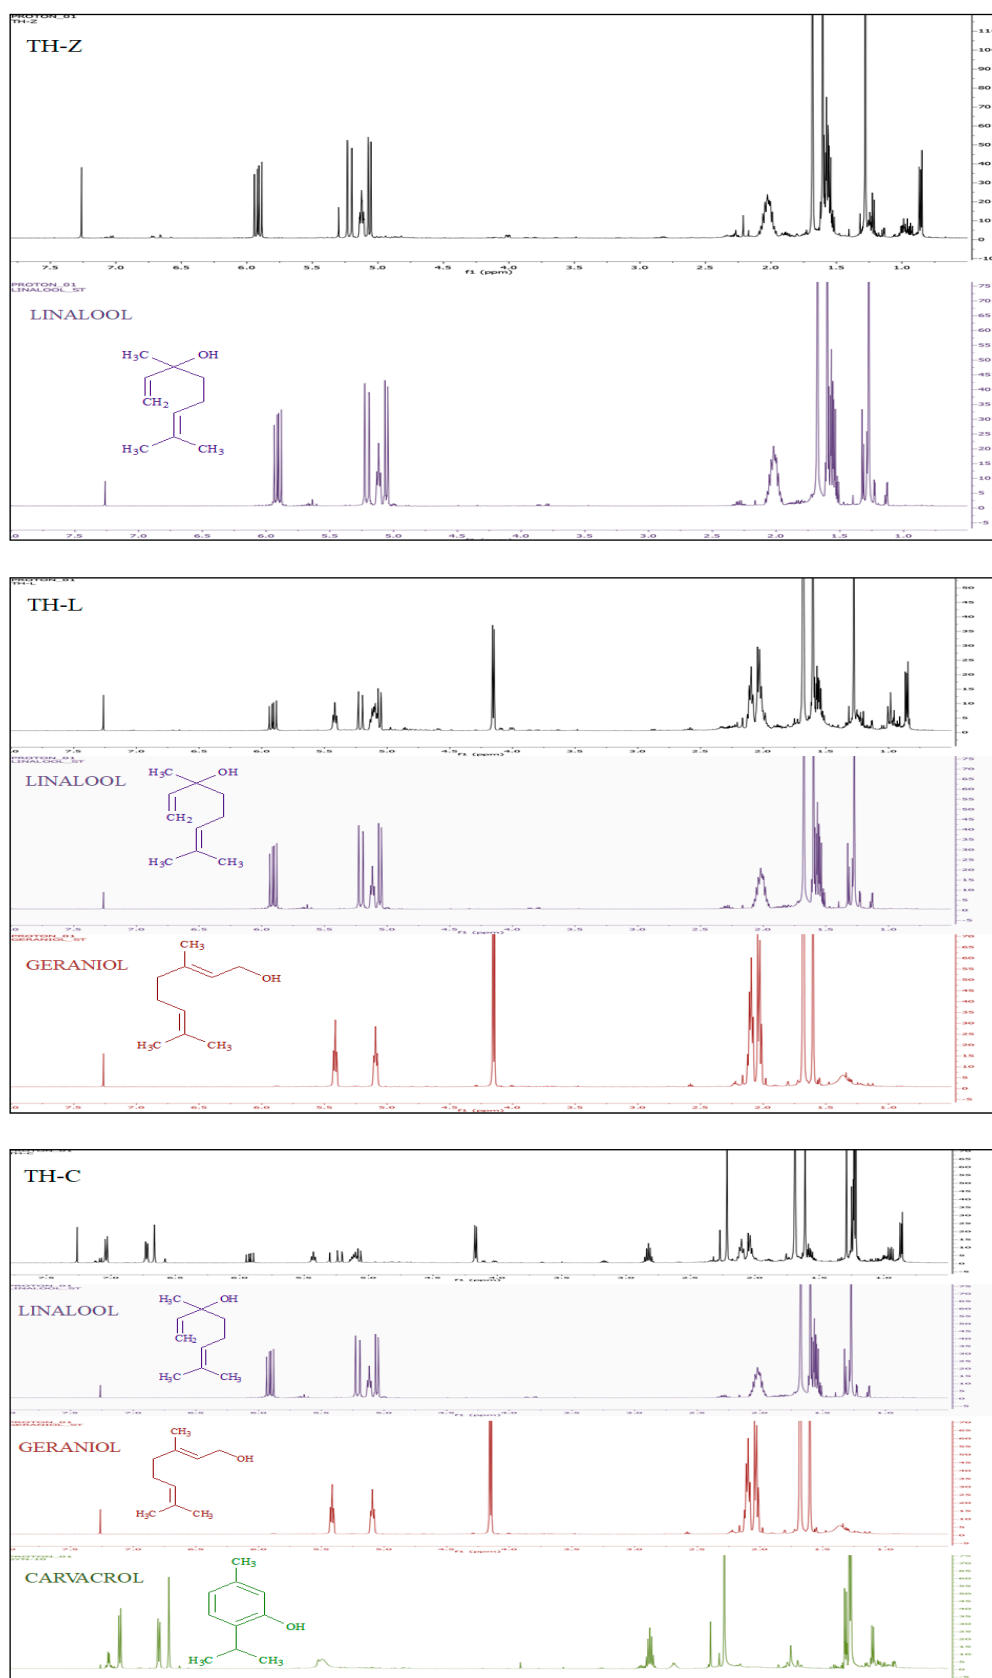

**Figure S1:**  $^1\text{H}$ -NMR from the analysis of the essential oils of *T. holosericeus* from three Ionian Islands, Greece (TH-Z: Zakynthos; TH-L: Lefkada; TH-C: Cephalonia) compared to the  $^1\text{H}$ -NMR of the standard of their main compounds.

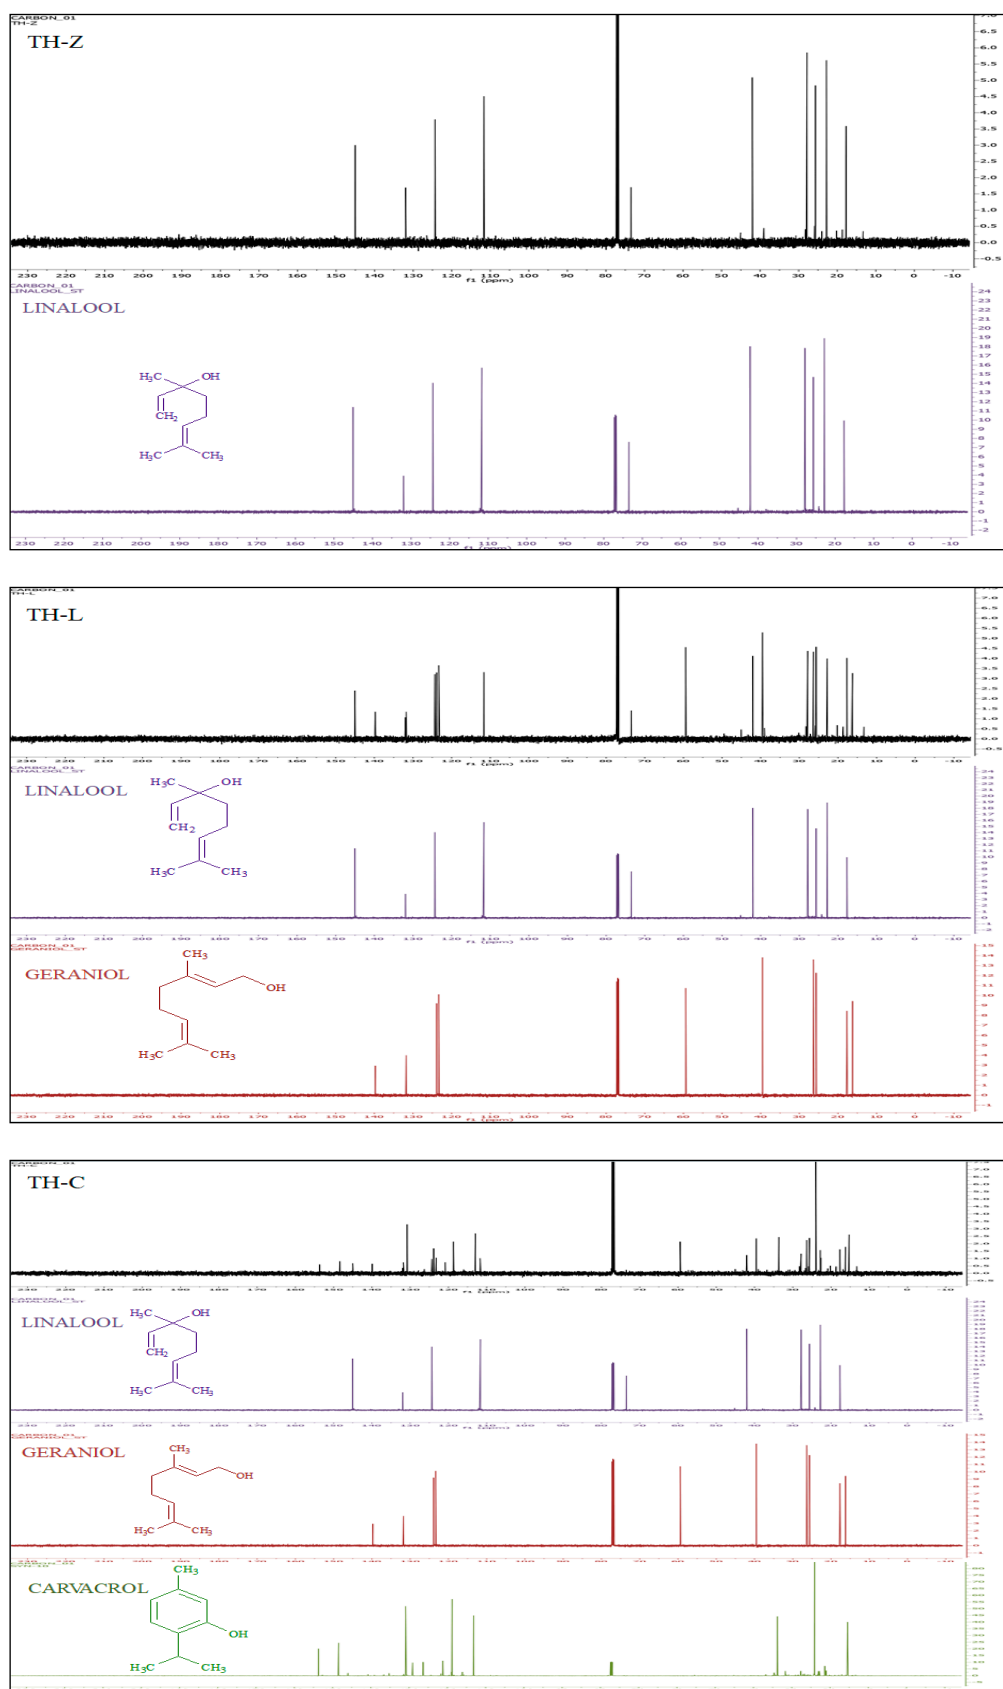

**Figure S2:**  $^{13}\text{C}$ -NMR from the analysis of the essential oils of *T. holosericeus* from three Ionian Islands, Greece (TH-Z: Zakyntos; TH-L: Lefkada; TH-C: Cephalonia) compared to the  $^{13}\text{C}$ -NMR of the standard of their main compounds.

## References

48. Uttu, A.J.; Sallau, M. S.; Iyun, O. R. A.; Ibrahim, H. Isolation, characterization and *in silico* molecular docking studies of two terpenoids from *Strychnos innocua* Delile root bark for antibacterial properties. *Adv. J. Chem. -Sect. A* **2022**, *5*, 241-252.  
<https://doi.org/10.22034/AJCA.2022.344451.1315>
49. Masila, V.M.; Ndakala, A.J.; Midiwo, J.O.; Byamukama, R.; Kamau, R.W.; Kumarihamy, M.; Muhammad, I. Synthesis of a pyrrolidine derivative of a carvotacetone and monoterpenes for anti-methicillin-resistant *Staphylococcus aureus* and anti-cryptococcal properties. *Nat. Prod. Res.* **2022**, *36*, 2321 – 2328.  
<https://doi.org/10.1080/14786419.2020.1833201>
50. Zimmermann, B.M.; Ngoc, T.T.; Tzaras, D.I.; Trinadh, K.; Teichert, J.F. Bifunctional copper catalyst enables ester reduction with H<sub>2</sub>: Expanding the reactivity space of nucleophilic copper hydrides. *J. Am. Chem. Soc.* **2021**, *143*, 40, 16865–16873.  
<https://doi.org/10.1021/jacs.1c09626>
