# Supplementary material for: Exploring the Ecological Preferences and Essential Oil Variability in Wild-Growing Populations of the Endangered Local Greek Endemic Thymus holosericeus (Lamiaceae)
Source: MDPI journal article supplement (doi:10.3390/plants12020348), 2023-01-11
Supplement: s1 [file s1]

**Supplementary Material Table S2.** Detailed monthly climate data for the three sampled areas of *Thymus holosericeus* in Cephalonia (TH-C), Zakynthos (TH-Z), and Lefkada (TH-L) islands, Ionian Sea, Greece derived in R from WorldClim version 2.1

| Monthly Climate data per sampled population of <i>Thymus holosericeus</i> |        |        |        |
|---------------------------------------------------------------------------|--------|--------|--------|
|                                                                           | TH-C   | TH-Z   | TH-L   |
| Precipitation in January (mm)                                             | 128.00 | 137.00 | 114.00 |
| Precipitation in February (mm)                                            | 121.00 | 113.00 | 120.00 |
| Precipitation in March (mm)                                               | 94.00  | 89.00  | 91.00  |
| Precipitation in April (mm)                                               | 71.00  | 59.00  | 69.00  |
| Precipitation in May (mm)                                                 | 34.00  | 26.00  | 39.00  |
| Precipitation in June (mm)                                                | 16.00  | 10.00  | 19.00  |
| Precipitation in July (mm)                                                | 12.00  | 8.00   | 14.00  |
| Precipitation in August (mm)                                              | 17.00  | 12.00  | 20.00  |
| Precipitation in September (mm)                                           | 47.00  | 40.00  | 49.00  |
| Precipitation in October (mm)                                             | 117.00 | 122.00 | 107.00 |
| Precipitation in November (mm)                                            | 162.00 | 157.00 | 161.00 |
| Precipitation in December (mm)                                            | 159.00 | 169.00 | 151.00 |
| Average Temperature in January (°C)                                       | 6.80   | 8.80   | 7.10   |
| Average Temperature in February (°C)                                      | 6.80   | 8.80   | 7.30   |
| Average Temperature in March (°C)                                         | 8.40   | 10.30  | 9.00   |
| Average Temperature in April (°C)                                         | 11.20  | 12.80  | 11.90  |
| Average Temperature in May (°C)                                           | 15.50  | 16.80  | 16.30  |
| Average Temperature in June (°C)                                          | 19.50  | 20.80  | 20.30  |
| Average Temperature in July (°C)                                          | 22.00  | 23.20  | 22.80  |
| Average Temperature in August (°C)                                        | 22.30  | 23.70  | 23.00  |
| Average Temperature in September (°C)                                     | 19.10  | 20.90  | 19.80  |
| Average Temperature in October (°C)                                       | 15.20  | 17.20  | 15.80  |
| Average Temperature in November (°C)                                      | 11.10  | 13.20  | 11.40  |
| Average Temperature in December (°C)                                      | 8.20   | 10.20  | 8.30   |
| Highest Temperature in January (°C)                                       | 10.00  | 12.00  | 10.70  |
| Highest Temperature in February (°C)                                      | 10.10  | 12.10  | 10.90  |
| Highest Temperature in March (°C)                                         | 12.20  | 13.90  | 13.10  |
| Highest Temperature in April (°C)                                         | 15.30  | 16.60  | 16.30  |
| Highest Temperature in May (°C)                                           | 20.30  | 21.20  | 21.40  |
| Highest Temperature in June (°C)                                          | 24.80  | 25.60  | 26.00  |
| Highest Temperature in July (°C)                                          | 27.50  | 28.20  | 28.90  |
| Highest Temperature in August (°C)                                        | 27.70  | 28.50  | 29.10  |
| Highest Temperature in September (°C)                                     | 24.00  | 25.30  | 25.20  |
| Highest Temperature in October (°C)                                       | 19.40  | 21.00  | 20.30  |
| Highest Temperature in November (°C)                                      | 14.60  | 16.50  | 15.20  |
| Highest Temperature in December (°C)                                      | 11.40  | 13.30  | 11.90  |
| Lowest Temperature in January (°C)                                        | 3.60   | 5.70   | 3.50   |
| Lowest Temperature in February (°C)                                       | 3.50   | 5.60   | 3.70   |
| Lowest Temperature in March (°C)                                          | 4.60   | 6.60   | 4.90   |
| Lowest Temperature in April (°C)                                          | 7.10   | 9.00   | 7.40   |

|                                      |       |       |       |
|--------------------------------------|-------|-------|-------|
| Lowest Temperature in May (°C)       | 10.70 | 12.50 | 11.20 |
| Lowest Temperature in June (°C)      | 14.20 | 16.00 | 14.50 |
| Lowest Temperature in July (°C)      | 16.40 | 18.20 | 16.70 |
| Lowest Temperature in August (°C)    | 16.80 | 18.80 | 16.90 |
| Lowest Temperature in September (°C) | 14.30 | 16.50 | 14.40 |
| Lowest Temperature in October (°C)   | 11.10 | 13.30 | 11.20 |
| Lowest Temperature in November (°C)  | 7.60  | 9.90  | 7.50  |
| Lowest Temperature in December (°C)  | 4.90  | 7.10  | 4.70  |
