# Supplementary material for: Exploring the Ecological Preferences and Essential Oil Variability in Wild-Growing Populations of the Endangered Local Greek Endemic Thymus holosericeus (Lamiaceae)
Source: Plants (Basel). 2023 Jan 11;12(2):348. doi: 10.3390/plants12020348 (PMC9864777; doi:10.3390/plants12020348)
Supplement: Supplementary file 1 [file plants-12-00348-s001.zip › _Supplementary Material S3.xlsx]

## Sheet: Legend
Supplementary material Table S3: Pearson’s Canonical Correlation Analysis calculated in SPSS for all compounds and the nineteen bioclimatic variables, the monthly precipitation, the monthly average temperature, the monthly highest temperature and the monthly lowest temperature. Double asterisk (**) represents that correlation is significant at the 0.01 level (two-tailed), single asterisk (*) repr…

## Sheet: Correlations
		[BIO1] Annual Mean Temperature	[BIO2] Mean Diurnal Range	[BIO3] Isothermality	[BIO4] Temperature Seasonality	[BIO5] Max Temperature of Warmest Month	[BIO6] Min Temperature of Coldest Month	[BIO7] Temperature Annual Range	[BIO8] Mean Temperature of Wettest Quarter	[BIO9] Mean Temperature of Driest Quarter	[BIO10] Mean Temperature of Warmest Quarter	[BIO11] Mean Temperature of Coldest Quarter	[BIO12] Annual Precipitation	[BIO13] Precipitation of Wettest Month	[BIO14] Precipitation of Driest Month	[BIO15] Precipitation Seasonality	[BIO16] Precipitation of Wettest Quarter	[BIO17] Precipitation of Driest Quarter	[BIO18] Precipitation of Warmest Quarter	[BIO19] Precipitation of Coldest Quarter	Precipitation in January	Precipitation in February	Precipitation in March	Precipitation in April	Precipitation in May	Precipitation in June	Precipitation in July	Precipitation in August	Precipitation in September	Precipitation in October	Precipitaion in November	Precipitation in December	Average Teperature in January	Average Teperature in February	Average Teperature in March	Average Teperature in April	Average Teperature in May	Average Teperature in June	Average Teperature in July	Average Teperature in August	Average Teperature in September	Average Teperature in October	Average Teperature in November	Average Teperature in December	Highest Teperature in January	Highest Teperature in February	Highest Teperature in March	Highest Teperature in April	Highest Teperature in May
α-Thujene	Pearson Correlation	.c	.c	.c	.c	.c	.c	.c	.c	.c	.c	.c	.c	.c	.c	.c	.c	.c	.c	.c	.c	.c	.c	.c	.c	.c	.c	.c	.c	.c	.c	.c	.c	.c	.c	.c	.c	.c	.c	.c	.c	.c	.c	.c	.c	.c	.c	.c	.c
	Sig. (2-tailed)	.	.	.	.	.	.	.	.	.	.	.	.	.	.	.	.	.	.	.	.	.	.	.	.	.	.	.	.	.	.	.	.	.	.	.	.	.	.	.	.	.	.	.	.	.	.	.	.
	N	1	1	1	1	1	1	1	1	1	1	1	1	1	1	1	1	1	1	1	1	1	1	1	1	1	1	1	1	1	1	1	1	1	1	1	1	1	1	1	1	1	1	1	1	1	1	1	1
α-Pinene	Pearson Correlation	-0.321	-0.567	-0.632	-0.391	-0.997	0	-0.518	-0.103	-0.591	-0.578	-0.143	0.655	0.115	-0.327	0.296	0.616	-0.343	-0.533	0.663	0.604	0.115	0.596	0.156	-0.381	-0.327	-0.327	-0.371	-0.212	0.655	0.189	0.444	-0.139	-0.24	-0.309	-0.436	-0.61	-0.61	-0.655	-0.5	-0.386	-0.292	-0.132	-0.044	-0.345	-0.397	-0.529	-0.735	-0.939
	Sig. (2-tailed)	0.792	0.616	0.564	0.744	0.052	1	0.653	0.934	0.597	0.608	0.908	0.546	0.927	0.788	0.808	0.578	0.777	0.642	0.539	0.587	0.927	0.593	0.901	0.751	0.788	0.788	0.758	0.864	0.546	0.879	0.707	0.911	0.846	0.8	0.713	0.582	0.582	0.546	0.667	0.748	0.811	0.916	0.972	0.776	0.74	0.645	0.475	0.224
	N	3	3	3	3	3	3	3	3	3	3	3	3	3	3	3	3	3	3	3	3	3	3	3	3	3	3	3	3	3	3	3	3	3	3	3	3	3	3	3	3	3	3	3	3	3	3	3	3
Camphene	Pearson Correlation	0.596	-1.000**	-.997*	-0.979	-0.5	0.822	-.998*	0.759	0.326	0.342	0.732	-0.249	0.882	-0.963	0.954	.998*	-0.967	0.392	0.993	.999*	-0.751	-0.321	-0.723	-0.977	-0.963	-0.963	-0.975	-0.924	0.994	-0.7	0.989	0.735	0.661	0.606	0.491	0.304	0.304	0.249	0.427	0.539	0.62	0.74	0.796	0.575	0.528	0.396	0.139	-0.251
	Sig. (2-tailed)	0.593	0.002	0.05	0.13	0.667	0.386	0.039	0.451	0.789	0.778	0.477	0.84	0.313	0.173	0.194	0.036	0.163	0.744	0.076	0.027	0.459	0.792	0.485	0.137	0.173	0.173	0.144	0.25	0.069	0.507	0.093	0.475	0.54	0.586	0.673	0.803	0.803	0.84	0.719	0.638	0.575	0.47	0.414	0.61	0.646	0.741	0.911	0.838
	N	3	3	3	3	3	3	3	3	3	3	3	3	3	3	3	3	3	3	3	3	3	3	3	3	3	3	3	3	3	3	3	3	3	3	3	3	3	3	3	3	3	3	3	3	3	3	3	3
β-Pinene	Pearson Correlation	.c	.c	.c	.c	.c	.c	.c	.c	.c	.c	.c	.c	.c	.c	.c	.c	.c	.c	.c	.c	.c	.c	.c	.c	.c	.c	.c	.c	.c	.c	.c	.c	.c	.c	.c	.c	.c	.c	.c	.c	.c	.c	.c	.c	.c	.c	.c	.c
	Sig. (2-tailed)	.	.	.	.	.	.	.	.	.	.	.	.	.	.	.	.	.	.	.	.	.	.	.	.	.	.	.	.	.	.	.	.	.	.	.	.	.	.	.	.	.	.	.	.	.	.	.	.
	N	1	1	1	1	1	1	1	1	1	1	1	1	1	1	1	1	1	1	1	1	1	1	1	1	1	1	1	1	1	1	1	1	1	1	1	1	1	1	1	1	1	1	1	1	1	1	1	1
1-Octen-3-ol	Pearson Correlation	0.196	-0.903	-0.935	-0.799	-0.822	0.5	-0.877	0.408	-0.109	-0.092	0.371	0.189	0.596	-0.756	0.734	0.927	-0.766	-0.038	0.948	0.922	-0.397	0.115	-0.359	-0.792	-0.756	-0.756	-0.786	-0.672	0.945	-0.327	0.832	0.375	0.277	0.208	0.072	-0.132	-0.132	-0.189	0	0.127	0.225	0.381	0.461	0.171	0.115	-0.034	-0.297	-0.64
	Sig. (2-tailed)	0.874	0.283	0.231	0.411	0.386	0.667	0.32	0.732	0.93	0.941	0.758	0.879	0.593	0.454	0.475	0.245	0.444	0.976	0.205	0.254	0.74	0.927	0.766	0.418	0.454	0.454	0.425	0.531	0.212	0.788	0.374	0.755	0.821	0.867	0.954	0.916	0.916	0.879	1	0.919	0.856	0.751	0.695	0.891	0.927	0.978	0.808	0.557
	N	3	3	3	3	3	3	3	3	3	3	3	3	3	3	3	3	3	3	3	3	3	3	3	3	3	3	3	3	3	3	3	3	3	3	3	3	3	3	3	3	3	3	3	3	3	3	3	3
Myrcene	Pearson Correlation	-0.453	-0.444	-0.515	-0.255	-.998*	-0.143	-0.391	-0.244	-0.701	-0.688	-0.283	0.756	-0.028	-0.189	0.157	0.497	-0.205	-0.648	0.549	0.484	0.255	0.705	0.295	-0.245	-0.189	-0.189	-0.235	-0.07	0.54	0.327	0.311	-0.279	-0.376	-0.442	-0.56	-0.717	-0.717	-0.756	-0.619	-0.514	-0.426	-0.272	-0.187	-0.475	-0.524	-0.645	-0.824	-0.978
	Sig. (2-tailed)	0.701	0.707	0.656	0.836	0.039	0.909	0.744	0.843	0.506	0.517	0.817	0.454	0.982	0.879	0.9	0.669	0.869	0.551	0.63	0.678	0.836	0.502	0.809	0.842	0.879	0.879	0.849	0.956	0.637	0.788	0.799	0.82	0.754	0.709	0.621	0.491	0.491	0.454	0.575	0.657	0.72	0.824	0.88	0.685	0.649	0.554	0.384	0.133
	N	3	3	3	3	3	3	3	3	3	3	3	3	3	3	3	3	3	3	3	3	3	3	3	3	3	3	3	3	3	3	3	3	3	3	3	3	3	3	3	3	3	3	3	3	3	3	3	3
α-Terpinene	Pearson Correlation	-1.000**	1.000**	1.000**	1.000**	-1.000**	-1.000**	1.000**	-1.000**	-1.000**	-1.000**	-1.000**	1.000**	-1.000**	1.000**	-1.000**	-1.000**	1.000**	-1.000**	-1.000**	-1.000**	1.000**	1.000**	1.000**	1.000**	1.000**	1.000**	1.000**	1.000**	-1.000**	1.000**	-1.000**	-1.000**	-1.000**	-1.000**	-1.000**	-1.000**	-1.000**	-1.000**	-1.000**	-1.000**	-1.000**	-1.000**	-1.000**	-1.000**	-1.000**	-1.000**	-1.000**	-1.000**
	Sig. (2-tailed)	.	.	.	.	.	.	.	.	.	.	.	.	.	.	.	.	.	.	.	.	.	.	.	.	.	.	.	.	.	.	.	.	.	.	.	.	.	.	.	.	.	.	.	.	.	.	.	.
	N	2	2	2	2	2	2	2	2	2	2	2	2	2	2	2	2	2	2	2	2	2	2	2	2	2	2	2	2	2	2	2	2	2	2	2	2	2	2	2	2	2	2	2	2	2	2	2	2
p-Cymene	Pearson Correlation	-1.000**	1.000**	1.000**	1.000**	-1.000**	-1.000**	1.000**	-1.000**	-1.000**	-1.000**	-1.000**	1.000**	-1.000**	1.000**	-1.000**	-1.000**	1.000**	-1.000**	-1.000**	-1.000**	1.000**	1.000**	1.000**	1.000**	1.000**	1.000**	1.000**	1.000**	-1.000**	1.000**	-1.000**	-1.000**	-1.000**	-1.000**	-1.000**	-1.000**	-1.000**	-1.000**	-1.000**	-1.000**	-1.000**	-1.000**	-1.000**	-1.000**	-1.000**	-1.000**	-1.000**	-1.000**
	Sig. (2-tailed)	.	.	.	.	.	.	.	.	.	.	.	.	.	.	.	.	.	.	.	.	.	.	.	.	.	.	.	.	.	.	.	.	.	.	.	.	.	.	.	.	.	.	.	.	.	.	.	.
	N	2	2	2	2	2	2	2	2	2	2	2	2	2	2	2	2	2	2	2	2	2	2	2	2	2	2	2	2	2	2	2	2	2	2	2	2	2	2	2	2	2	2	2	2	2	2	2	2
Limonene	Pearson Correlation	.c	.c	.c	.c	.c	.c	.c	.c	.c	.c	.c	.c	.c	.c	.c	.c	.c	.c	.c	.c	.c	.c	.c	.c	.c	.c	.c	.c	.c	.c	.c	.c	.c	.c	.c	.c	.c	.c	.c	.c	.c	.c	.c	.c	.c	.c	.c	.c
	Sig. (2-tailed)	.	.	.	.	.	.	.	.	.	.	.	.	.	.	.	.	.	.	.	.	.	.	.	.	.	.	.	.	.	.	.	.	.	.	.	.	.	.	.	.	.	.	.	.	.	.	.	.
	N	1	1	1	1	1	1	1	1	1	1	1	1	1	1	1	1	1	1	1	1	1	1	1	1	1	1	1	1	1	1	1	1	1	1	1	1	1	1	1	1	1	1	1	1	1	1	1	1
1,8-Cineole	Pearson Correlation	1.000**	-1.000**	-1.000**	-1.000**	-1.000**	1.000**	-1.000**	1.000**	1.000**	1.000**	1.000**	-1.000**	1.000**	-1.000**	1.000**	1.000**	-1.000**	1.000**	1.000**	1.000**	-1.000**	-1.000**	-1.000**	-1.000**	-1.000**	-1.000**	-1.000**	-1.000**	1.000**	-1.000**	1.000**	1.000**	1.000**	1.000**	1.000**	1.000**	1.000**	1.000**	1.000**	1.000**	1.000**	1.000**	1.000**	1.000**	1.000**	1.000**	1.000**	-1.000**
	Sig. (2-tailed)	.	.	.	.	.	.	.	.	.	.	.	.	.	.	.	.	.	.	.	.	.	.	.	.	.	.	.	.	.	.	.	.	.	.	.	.	.	.	.	.	.	.	.	.	.	.	.	.
	N	2	2	2	2	2	2	2	2	2	2	2	2	2	2	2	2	2	2	2	2	2	2	2	2	2	2	2	2	2	2	2	2	2	2	2	2	2	2	2	2	2	2	2	2	2	2	2	2
γ-Terpinene	Pearson Correlation	-0.56	-0.329	-0.405	-0.133	-0.983	-0.264	-0.274	-0.362	-0.784	-0.773	-0.4	0.831	-0.152	-0.066	0.033	0.385	-0.082	-0.738	0.441	0.372	0.373	0.787	0.411	-0.123	-0.066	-0.066	-0.112	0.054	0.432	0.442	0.191	-0.396	-0.488	-0.549	-0.659	-0.798	-0.798	-0.831	-0.711	-0.616	-0.535	-0.389	-0.307	-0.581	-0.626	-0.735	-0.888	-0.996
	Sig. (2-tailed)	0.622	0.786	0.735	0.915	0.118	0.83	0.823	0.764	0.427	0.438	0.738	0.375	0.903	0.958	0.979	0.748	0.948	0.472	0.709	0.757	0.757	0.423	0.73	0.921	0.958	0.958	0.928	0.965	0.716	0.709	0.878	0.741	0.675	0.63	0.542	0.412	0.412	0.375	0.496	0.578	0.641	0.745	0.801	0.606	0.57	0.475	0.304	0.054
	N	3	3	3	3	3	3	3	3	3	3	3	3	3	3	3	3	3	3	3	3	3	3	3	3	3	3	3	3	3	3	3	3	3	3	3	3	3	3	3	3	3	3	3	3	3	3	3	3
cis-Sabinene hydrate	Pearson Correlation	.c	.c	.c	.c	.c	.c	.c	.c	.c	.c	.c	.c	.c	.c	.c	.c	.c	.c	.c	.c	.c	.c	.c	.c	.c	.c	.c	.c	.c	.c	.c	.c	.c	.c	.c	.c	.c	.c	.c	.c	.c	.c	.c	.c	.c	.c	.c	.c
	Sig. (2-tailed)	.	.	.	.	.	.	.	.	.	.	.	.	.	.	.	.	.	.	.	.	.	.	.	.	.	.	.	.	.	.	.	.	.	.	.	.	.	.	.	.	.	.	.	.	.	.	.	.
	N	1	1	1	1	1	1	1	1	1	1	1	1	1	1	1	1	1	1	1	1	1	1	1	1	1	1	1	1	1	1	1	1	1	1	1	1	1	1	1	1	1	1	1	1	1	1	1	1
cis-Linalool oxide (furanoid)	Pearson Correlation	0.663	0.203	0.282	0.003	0.95	0.388	0.146	0.481	0.858	0.849	0.516	-0.897	0.28	-0.065	0.098	-0.261	-0.049	0.82	-0.32	-0.247	-0.491	-0.861	-0.527	-0.008	-0.065	-0.065	-0.018	-0.184	-0.31	-0.555	-0.061	0.513	0.598	0.654	0.751	0.87	0.87	0.897	0.797	0.714	0.641	0.507	0.429	0.682	0.722	0.817	0.94	.999*
	Sig. (2-tailed)	0.538	0.87	0.818	0.998	0.201	0.746	0.907	0.68	0.343	0.354	0.654	0.292	0.819	0.958	0.938	0.832	0.969	0.388	0.793	0.841	0.673	0.34	0.647	0.995	0.958	0.958	0.988	0.882	0.799	0.625	0.961	0.657	0.592	0.546	0.459	0.328	0.328	0.292	0.413	0.494	0.557	0.662	0.718	0.522	0.486	0.391	0.221	0.03
	N	3	3	3	3	3	3	3	3	3	3	3	3	3	3	3	3	3	3	3	3	3	3	3	3	3	3	3	3	3	3	3	3	3	3	3	3	3	3	3	3	3	3	3	3	3	3	3	3
trans-Linalool oxide(furanoid)	Pearson Correlation	0.85	-0.086	-0.005	-0.284	0.821	0.636	-0.144	0.712	0.969	0.965	0.74	-0.986	0.544	-0.349	0.379	0.027	-0.333	0.95	-0.035	0.041	-0.721	-0.971	-0.749	-0.294	-0.349	-0.349	-0.305	-0.459	-0.024	-0.771	0.228	0.737	0.803	0.843	0.909	0.975	0.975	0.986	0.937	0.885	0.834	0.733	0.67	0.863	0.89	0.948	.998*	0.944
	Sig. (2-tailed)	0.353	0.945	0.997	0.816	0.387	0.561	0.908	0.495	0.158	0.169	0.469	0.107	0.634	0.773	0.752	0.983	0.784	0.203	0.978	0.974	0.488	0.154	0.462	0.81	0.773	0.773	0.803	0.697	0.985	0.44	0.853	0.472	0.407	0.361	0.273	0.143	0.143	0.107	0.228	0.309	0.372	0.477	0.533	0.337	0.301	0.206	0.036	0.215
	N	3	3	3	3	3	3	3	3	3	3	3	3	3	3	3	3	3	3	3	3	3	3	3	3	3	3	3	3	3	3	3	3	3	3	3	3	3	3	3	3	3	3	3	3	3	3	3	3
Linalool	Pearson Correlation	.998*	-0.549	-0.48	-0.706	0.451	0.926	-0.597	0.96	0.97	0.974	0.971	-0.947	0.877	-0.752	0.773	0.498	-0.741	0.985	0.444	0.511	-0.963	-0.968	-0.974	-0.713	-0.752	-0.752	-0.72	-0.826	0.454	-0.981	0.663	0.97	0.99	.997*	.998*	0.964	0.964	0.947	0.991	1.000**	0.996	0.968	0.942	.999*	1.000*	0.985	0.905	0.673
	Sig. (2-tailed)	0.038	0.63	0.681	0.501	0.702	0.246	0.593	0.18	0.157	0.146	0.154	0.209	0.319	0.458	0.437	0.668	0.468	0.112	0.707	0.659	0.173	0.161	0.146	0.495	0.458	0.458	0.488	0.382	0.7	0.125	0.538	0.157	0.091	0.046	0.042	0.172	0.172	0.209	0.088	0.006	0.057	0.161	0.218	0.022	0.014	0.109	0.279	0.53
	N	3	3	3	3	3	3	3	3	3	3	3	3	3	3	3	3	3	3	3	3	3	3	3	3	3	3	3	3	3	3	3	3	3	3	3	3	3	3	3	3	3	3	3	3	3	3	3	3
Camphor	Pearson Correlation	-1,000**	1,000**	1,000**	1,000**	1,000**	-1,000**	1,000**	-1,000**	-1,000**	-1,000**	-1,000**	1,000**	-1,000**	1,000**	-1,000**	-1,000**	1,000**	-1,000**	-1,000**	-1,000**	1,000**	1,000**	1,000**	1,000**	1,000**	1,000**	1,000**	1,000**	-1,000**	1,000**	-1,000**	-1,000**	-1,000**	-1,000**	-1,000**	-1,000**	-1,000**	-1,000**	-1,000**	-1,000**	-1,000**	-1,000**	-1,000**	-1,000**	-1,000**	-1,000**	-1,000**	1,000**
	Sig. (2-tailed)
	N	2	2	2	2	2	2	2	2	2	2	2	2	2	2	2	2	2	2	2	2	2	2	2	2	2	2	2	2	2	2	2	2	2	2	2	2	2	2	2	2	2	2	2	2	2	2	2	2
Borneol	Pearson Correlation	0.557	-.999*	-1.000*	-0.968	-0.541	0.794	-0.994	0.727	0.28	0.297	0.698	-0.202	0.858	-0.949	0.938	1.000**	-0.954	0.348	.997*	1.000**	-0.719	-0.275	-0.69	-0.966	-0.949	-0.949	-0.963	-0.905	.998*	-0.665	0.981	0.702	0.625	0.567	0.449	0.258	0.258	0.202	0.383	0.498	0.581	0.707	0.766	0.535	0.487	0.352	0.092	-0.297
	Sig. (2-tailed)	0.624	0.032	0.02	0.161	0.636	0.416	0.069	0.482	0.819	0.808	0.508	0.871	0.343	0.204	0.225	0.006	0.194	0.774	0.045	0.003	0.489	0.823	0.516	0.167	0.204	0.204	0.174	0.28	0.038	0.537	0.124	0.505	0.571	0.616	0.704	0.834	0.834	0.871	0.75	0.668	0.605	0.5	0.444	0.64	0.676	0.771	0.941	0.808
	N	3	3	3	3	3	3	3	3	3	3	3	3	3	3	3	3	3	3	3	3	3	3	3	3	3	3	3	3	3	3	3	3	3	3	3	3	3	3	3	3	3	3	3	3	3	3	3	3
Terpinen-4-ol	Pearson Correlation	-0.289	-0.594	-0.658	-0.421	-0.993	0.033	-0.546	-0.07	-0.564	-0.55	-0.111	0.629	0.148	-0.358	0.328	0.641	-0.374	-0.505	0.687	0.63	0.082	0.569	0.123	-0.412	-0.358	-0.358	-0.402	-0.244	0.679	0.156	0.473	-0.106	-0.208	-0.277	-0.406	-0.583	-0.583	-0.629	-0.471	-0.355	-0.26	-0.099	-0.011	-0.314	-0.367	-0.501	-0.712	-0.927
	Sig. (2-tailed)	0.813	0.595	0.543	0.723	0.074	0.979	0.632	0.955	0.618	0.629	0.929	0.567	0.906	0.767	0.787	0.557	0.756	0.663	0.518	0.566	0.948	0.615	0.922	0.73	0.767	0.767	0.737	0.843	0.525	0.9	0.686	0.932	0.867	0.821	0.734	0.603	0.603	0.567	0.688	0.769	0.832	0.937	0.993	0.797	0.761	0.666	0.496	0.245
	N	3	3	3	3	3	3	3	3	3	3	3	3	3	3	3	3	3	3	3	3	3	3	3	3	3	3	3	3	3	3	3	3	3	3	3	3	3	3	3	3	3	3	3	3	3	3	3	3
α-Terpineol	Pearson Correlation	-0.136	-0.713	-0.767	-0.558	-0.963	0.189	-0.671	0.087	-0.428	-0.413	0.046	0.5	0.3	-0.5	0.471	0.753	-0.514	-0.363	0.792	0.744	-0.075	0.434	-0.034	-0.549	-0.5	-0.5	-0.54	-0.392	0.786	0	0.605	0.051	-0.052	-0.124	-0.258	-0.449	-0.449	-0.5	-0.327	-0.204	-0.106	0.058	0.145	-0.161	-0.217	-0.359	-0.593	-0.857
	Sig. (2-tailed)	0.913	0.495	0.443	0.623	0.173	0.879	0.532	0.945	0.718	0.729	0.971	0.667	0.806	0.667	0.687	0.457	0.656	0.763	0.418	0.466	0.952	0.715	0.978	0.63	0.667	0.667	0.637	0.743	0.425	1	0.586	0.968	0.967	0.921	0.834	0.703	0.703	0.667	0.788	0.869	0.932	0.963	0.907	0.897	0.861	0.766	0.596	0.345
	N	3	3	3	3	3	3	3	3	3	3	3	3	3	3	3	3	3	3	3	3	3	3	3	3	3	3	3	3	3	3	3	3	3	3	3	3	3	3	3	3	3	3	3	3	3	3	3	3
trans-Dihydro carvone	Pearson Correlation	.c	.c	.c	.c	.c	.c	.c	.c	.c	.c	.c	.c	.c	.c	.c	.c	.c	.c	.c	.c	.c	.c	.c	.c	.c	.c	.c	.c	.c	.c	.c	.c	.c	.c	.c	.c	.c	.c	.c	.c	.c	.c	.c	.c	.c	.c	.c	.c
	Sig. (2-tailed)	.	.	.	.	.	.	.	.	.	.	.	.	.	.	.	.	.	.	.	.	.	.	.	.	.	.	.	.	.	.	.	.	.	.	.	.	.	.	.	.	.	.	.	.	.	.	.	.
	N	1	1	1	1	1	1	1	1	1	1	1	1	1	1	1	1	1	1	1	1	1	1	1	1	1	1	1	1	1	1	1	1	1	1	1	1	1	1	1	1	1	1	1	1	1	1	1	1
Nerol	Pearson Correlation	-1.000**	-1.000**	-1.000**	-1.000**	-1.000**	.c	-1.000**	-1.000**	-1.000**	-1.000**	-1.000**	1.000**	1.000**	-1.000**	1.000**	1.000**	-1.000**	-1.000**	1.000**	1.000**	1.000**	1.000**	1.000**	-1.000**	-1.000**	-1.000**	-1.000**	-1.000**	1.000**	1.000**	1.000**	-1.000**	-1.000**	-1.000**	-1.000**	-1.000**	-1.000**	-1.000**	-1.000**	-1.000**	-1.000**	-1.000**	-1.000**	-1.000**	-1.000**	-1.000**	-1.000**	-1.000**
	Sig. (2-tailed)	.	.	.	.	.	.	.	.	.	.	.	.	.	.	.	.	.	.	.	.	.	.	.	.	.	.	.	.	.	.	.	.	.	.	.	.	.	.	.	.	.	.	.	.	.	.	.	.
	N	2	2	2	2	2	2	2	2	2	2	2	2	2	2	2	2	2	2	2	2	2	2	2	2	2	2	2	2	2	2	2	2	2	2	2	2	2	2	2	2	2	2	2	2	2	2	2	2
Neral	Pearson Correlation	1.000**	1.000**	1.000**	1.000**	1.000**	.c	1.000**	1.000**	1.000**	1.000**	1.000**	-1.000**	-1.000**	1.000**	-1.000**	-1.000**	1.000**	1.000**	-1.000**	-1.000**	-1.000**	-1.000**	-1.000**	1.000**	1.000**	1.000**	1.000**	1.000**	-1.000**	-1.000**	-1.000**	1.000**	1.000**	1.000**	1.000**	1.000**	1.000**	1.000**	1.000**	1.000**	1.000**	1.000**	1.000**	1.000**	1.000**	1.000**	1.000**	1.000**
	Sig. (2-tailed)	.	.	.	.	.	.	.	.	.	.	.	.	.	.	.	.	.	.	.	.	.	.	.	.	.	.	.	.	.	.	.	.	.	.	.	.	.	.	.	.	.	.	.	.	.	.	.	.
	N	2	2	2	2	2	2	2	2	2	2	2	2	2	2	2	2	2	2	2	2	2	2	2	2	2	2	2	2	2	2	2	2	2	2	2	2	2	2	2	2	2	2	2	2	2	2	2	2
Carvone	Pearson Correlation	.c	.c	.c	.c	.c	.c	.c	.c	.c	.c	.c	.c	.c	.c	.c	.c	.c	.c	.c	.c	.c	.c	.c	.c	.c	.c	.c	.c	.c	.c	.c	.c	.c	.c	.c	.c	.c	.c	.c	.c	.c	.c	.c	.c	.c	.c	.c	.c
	Sig. (2-tailed)	.	.	.	.	.	.	.	.	.	.	.	.	.	.	.	.	.	.	.	.	.	.	.	.	.	.	.	.	.	.	.	.	.	.	.	.	.	.	.	.	.	.	.	.	.	.	.	.
	N	1	1	1	1	1	1	1	1	1	1	1	1	1	1	1	1	1	1	1	1	1	1	1	1	1	1	1	1	1	1	1	1	1	1	1	1	1	1	1	1	1	1	1	1	1	1	1	1
Thymoquinone	Pearson Correlation	.c	.c	.c	.c	.c	.c	.c	.c	.c	.c	.c	.c	.c	.c	.c	.c	.c	.c	.c	.c	.c	.c	.c	.c	.c	.c	.c	.c	.c	.c	.c	.c	.c	.c	.c	.c	.c	.c	.c	.c	.c	.c	.c	.c	.c	.c	.c	.c
	Sig. (2-tailed)	.	.	.	.	.	.	.	.	.	.	.	.	.	.	.	.	.	.	.	.	.	.	.	.	.	.	.	.	.	.	.	.	.	.	.	.	.	.	.	.	.	.	.	.	.	.	.	.
	N	1	1	1	1	1	1	1	1	1	1	1	1	1	1	1	1	1	1	1	1	1	1	1	1	1	1	1	1	1	1	1	1	1	1	1	1	1	1	1	1	1	1	1	1	1	1	1	1
Geraniol	Pearson Correlation	1.000**	1.000**	1.000**	1.000**	1.000**	.c	1.000**	1.000**	1.000**	1.000**	1.000**	-1.000**	-1.000**	1.000**	-1.000**	-1.000**	1.000**	1.000**	-1.000**	-1.000**	-1.000**	-1.000**	-1.000**	1.000**	1.000**	1.000**	1.000**	1.000**	-1.000**	-1.000**	-1.000**	1.000**	1.000**	1.000**	1.000**	1.000**	1.000**	1.000**	1.000**	1.000**	1.000**	1.000**	1.000**	1.000**	1.000**	1.000**	1.000**	1.000**
	Sig. (2-tailed)	.	.	.	.	.	.	.	.	.	.	.	.	.	.	.	.	.	.	.	.	.	.	.	.	.	.	.	.	.	.	.	.	.	.	.	.	.	.	.	.	.	.	.	.	.	.	.	.
	N	2	2	2	2	2	2	2	2	2	2	2	2	2	2	2	2	2	2	2	2	2	2	2	2	2	2	2	2	2	2	2	2	2	2	2	2	2	2	2	2	2	2	2	2	2	2	2	2
Geranial	Pearson Correlation	1.000**	1.000**	1.000**	1.000**	1.000**	.c	1.000**	1.000**	1.000**	1.000**	1.000**	-1.000**	-1.000**	1.000**	-1.000**	-1.000**	1.000**	1.000**	-1.000**	-1.000**	-1.000**	-1.000**	-1.000**	1.000**	1.000**	1.000**	1.000**	1.000**	-1.000**	-1.000**	-1.000**	1.000**	1.000**	1.000**	1.000**	1.000**	1.000**	1.000**	1.000**	1.000**	1.000**	1.000**	1.000**	1.000**	1.000**	1.000**	1.000**	1.000**
	Sig. (2-tailed)	.	.	.	.	.	.	.	.	.	.	.	.	.	.	.	.	.	.	.	.	.	.	.	.	.	.	.	.	.	.	.	.	.	.	.	.	.	.	.	.	.	.	.	.	.	.	.	.
	N	2	2	2	2	2	2	2	2	2	2	2	2	2	2	2	2	2	2	2	2	2	2	2	2	2	2	2	2	2	2	2	2	2	2	2	2	2	2	2	2	2	2	2	2	2	2	2	2
Bornyl acetate	Pearson Correlation	-1.000**	-1.000**	-1.000**	-1.000**	-1.000**	.c	-1.000**	-1.000**	-1.000**	-1.000**	-1.000**	1.000**	1.000**	-1.000**	1.000**	1.000**	-1.000**	-1.000**	1.000**	1.000**	1.000**	1.000**	1.000**	-1.000**	-1.000**	-1.000**	-1.000**	-1.000**	1.000**	1.000**	1.000**	-1.000**	-1.000**	-1.000**	-1.000**	-1.000**	-1.000**	-1.000**	-1.000**	-1.000**	-1.000**	-1.000**	-1.000**	-1.000**	-1.000**	-1.000**	-1.000**	-1.000**
	Sig. (2-tailed)	.	.	.	.	.	.	.	.	.	.	.	.	.	.	.	.	.	.	.	.	.	.	.	.	.	.	.	.	.	.	.	.	.	.	.	.	.	.	.	.	.	.	.	.	.	.	.	.
	N	2	2	2	2	2	2	2	2	2	2	2	2	2	2	2	2	2	2	2	2	2	2	2	2	2	2	2	2	2	2	2	2	2	2	2	2	2	2	2	2	2	2	2	2	2	2	2	2
Thymol	Pearson Correlation	-0.712	-0.136	-0.216	0.065	-0.927	-0.45	-0.078	-0.539	-0.891	-0.883	-0.573	0.925	-0.344	0.133	-0.165	0.195	0.117	-0.857	0.255	0.181	0.549	0.894	0.583	0.075	0.133	0.133	0.086	0.251	0.245	0.61	-0.007	-0.57	-0.651	-0.704	-0.794	-0.901	-0.901	-0.925	-0.836	-0.76	-0.691	-0.564	-0.489	-0.73	-0.768	-0.854	-0.961	-0.993
	Sig. (2-tailed)	0.495	0.913	0.861	0.959	0.245	0.703	0.95	0.637	0.3	0.311	0.611	0.249	0.776	0.915	0.895	0.875	0.926	0.345	0.836	0.884	0.63	0.296	0.604	0.952	0.915	0.915	0.945	0.839	0.843	0.582	0.996	0.614	0.549	0.503	0.416	0.285	0.285	0.249	0.37	0.451	0.514	0.619	0.675	0.479	0.443	0.348	0.178	0.073
	N	3	3	3	3	3	3	3	3	3	3	3	3	3	3	3	3	3	3	3	3	3	3	3	3	3	3	3	3	3	3	3	3	3	3	3	3	3	3	3	3	3	3	3	3	3	3	3	3
Carvacrol	Pearson Correlation	-0.738	-0.099	-0.18	0.102	-0.912	-0.483	-0.041	-0.571	-0.907	-0.9	-0.603	0.938	-0.379	0.17	-0.202	0.159	0.154	-0.875	0.219	0.144	0.58	0.91	0.613	0.112	0.17	0.17	0.123	0.287	0.208	0.64	-0.044	-0.6	-0.679	-0.73	-0.817	-0.917	-0.917	-0.938	-0.856	-0.783	-0.718	-0.594	-0.521	-0.755	-0.791	-0.873	-0.971	-0.989
	Sig. (2-tailed)	0.472	0.937	0.885	0.935	0.268	0.679	0.974	0.613	0.276	0.287	0.588	0.225	0.752	0.892	0.871	0.899	0.902	0.321	0.859	0.908	0.606	0.273	0.58	0.928	0.892	0.892	0.921	0.815	0.866	0.558	0.972	0.59	0.525	0.479	0.392	0.262	0.262	0.225	0.346	0.427	0.49	0.595	0.651	0.455	0.419	0.324	0.154	0.097
	N	3	3	3	3	3	3	3	3	3	3	3	3	3	3	3	3	3	3	3	3	3	3	3	3	3	3	3	3	3	3	3	3	3	3	3	3	3	3	3	3	3	3	3	3	3	3	3	3
Geranyl acetate	Pearson Correlation	.c	.c	.c	.c	.c	.c	.c	.c	.c	.c	.c	.c	.c	.c	.c	.c	.c	.c	.c	.c	.c	.c	.c	.c	.c	.c	.c	.c	.c	.c	.c	.c	.c	.c	.c	.c	.c	.c	.c	.c	.c	.c	.c	.c	.c	.c	.c	.c
	Sig. (2-tailed)	.	.	.	.	.	.	.	.	.	.	.	.	.	.	.	.	.	.	.	.	.	.	.	.	.	.	.	.	.	.	.	.	.	.	.	.	.	.	.	.	.	.	.	.	.	.	.	.
	N	1	1	1	1	1	1	1	1	1	1	1	1	1	1	1	1	1	1	1	1	1	1	1	1	1	1	1	1	1	1	1	1	1	1	1	1	1	1	1	1	1	1	1	1	1	1	1	1
β-Caryophyllene	Pearson Correlation	0.978	-0.42	-0.345	-0.593	0.579	0.86	-0.472	0.908	0.995	0.997	0.925	-0.984	0.796	-0.646	0.671	0.364	-0.634	1.000*	0.306	0.378	-0.913	-0.995	-0.929	-0.601	-0.646	-0.646	-0.61	-0.733	0.317	-0.941	0.545	0.923	0.958	0.976	0.997	0.993	0.993	0.984	1.000**	0.99	0.972	0.92	0.882	0.983	0.992	1.000*	0.958	0.775
	Sig. (2-tailed)	0.133	0.724	0.776	0.596	0.607	0.34	0.687	0.275	0.062	0.052	0.249	0.114	0.414	0.553	0.532	0.763	0.563	0.017	0.802	0.753	0.267	0.066	0.241	0.589	0.553	0.553	0.582	0.476	0.795	0.219	0.633	0.252	0.186	0.14	0.053	0.077	0.077	0.114	0.007	0.088	0.152	0.256	0.312	0.116	0.08	0.015	0.185	0.435
	N	3	3	3	3	3	3	3	3	3	3	3	3	3	3	3	3	3	3	3	3	3	3	3	3	3	3	3	3	3	3	3	3	3	3	3	3	3	3	3	3	3	3	3	3	3	3	3	3
β-Copaene	Pearson Correlation	.c	.c	.c	.c	.c	.c	.c	.c	.c	.c	.c	.c	.c	.c	.c	.c	.c	.c	.c	.c	.c	.c	.c	.c	.c	.c	.c	.c	.c	.c	.c	.c	.c	.c	.c	.c	.c	.c	.c	.c	.c	.c	.c	.c	.c	.c	.c	.c
	Sig. (2-tailed)	.	.	.	.	.	.	.	.	.	.	.	.	.	.	.	.	.	.	.	.	.	.	.	.	.	.	.	.	.	.	.	.	.	.	.	.	.	.	.	.	.	.	.	.	.	.	.	.
	N	1	1	1	1	1	1	1	1	1	1	1	1	1	1	1	1	1	1	1	1	1	1	1	1	1	1	1	1	1	1	1	1	1	1	1	1	1	1	1	1	1	1	1	1	1	1	1	1
α-Humulene	Pearson Correlation	.c	.c	.c	.c	.c	.c	.c	.c	.c	.c	.c	.c	.c	.c	.c	.c	.c	.c	.c	.c	.c	.c	.c	.c	.c	.c	.c	.c	.c	.c	.c	.c	.c	.c	.c	.c	.c	.c	.c	.c	.c	.c	.c	.c	.c	.c	.c	.c
	Sig. (2-tailed)	.	.	.	.	.	.	.	.	.	.	.	.	.	.	.	.	.	.	.	.	.	.	.	.	.	.	.	.	.	.	.	.	.	.	.	.	.	.	.	.	.	.	.	.	.	.	.	.
	N	1	1	1	1	1	1	1	1	1	1	1	1	1	1	1	1	1	1	1	1	1	1	1	1	1	1	1	1	1	1	1	1	1	1	1	1	1	1	1	1	1	1	1	1	1	1	1	1
Germacrene D	Pearson Correlation	0.3	0.585	0.649	0.41	0.995	-0.021	0.537	0.082	0.574	0.56	0.122	-0.638	-0.136	0.347	-0.317	-0.632	0.363	0.515	-0.679	-0.621	-0.093	-0.579	-0.134	0.401	0.347	0.347	0.391	0.232	-0.671	-0.168	-0.463	0.118	0.219	0.288	0.417	0.593	0.593	0.638	0.481	0.366	0.272	0.111	0.023	0.325	0.378	0.511	0.72	0.931
	Sig. (2-tailed)	0.806	0.602	0.551	0.731	0.066	0.986	0.639	0.948	0.611	0.621	0.922	0.559	0.913	0.774	0.795	0.564	0.764	0.656	0.525	0.574	0.94	0.607	0.914	0.737	0.774	0.774	0.744	0.851	0.532	0.893	0.694	0.925	0.859	0.814	0.726	0.596	0.596	0.559	0.68	0.762	0.825	0.929	0.985	0.789	0.753	0.659	0.488	0.238
	N	3	3	3	3	3	3	3	3	3	3	3	3	3	3	3	3	3	3	3	3	3	3	3	3	3	3	3	3	3	3	3	3	3	3	3	3	3	3	3	3	3	3	3	3	3	3	3	3
Bicyclogermacrene	Pearson Correlation	.c	.c	.c	.c	.c	.c	.c	.c	.c	.c	.c	.c	.c	.c	.c	.c	.c	.c	.c	.c	.c	.c	.c	.c	.c	.c	.c	.c	.c	.c	.c	.c	.c	.c	.c	.c	.c	.c	.c	.c	.c	.c	.c	.c	.c	.c	.c	.c
	Sig. (2-tailed)	.	.	.	.	.	.	.	.	.	.	.	.	.	.	.	.	.	.	.	.	.	.	.	.	.	.	.	.	.	.	.	.	.	.	.	.	.	.	.	.	.	.	.	.	.	.	.	.
	N	1	1	1	1	1	1	1	1	1	1	1	1	1	1	1	1	1	1	1	1	1	1	1	1	1	1	1	1	1	1	1	1	1	1	1	1	1	1	1	1	1	1	1	1	1	1	1	1
Geranyl isobutanoate	Pearson Correlation	.c	.c	.c	.c	.c	.c	.c	.c	.c	.c	.c	.c	.c	.c	.c	.c	.c	.c	.c	.c	.c	.c	.c	.c	.c	.c	.c	.c	.c	.c	.c	.c	.c	.c	.c	.c	.c	.c	.c	.c	.c	.c	.c	.c	.c	.c	.c	.c
	Sig. (2-tailed)	.	.	.	.	.	.	.	.	.	.	.	.	.	.	.	.	.	.	.	.	.	.	.	.	.	.	.	.	.	.	.	.	.	.	.	.	.	.	.	.	.	.	.	.	.	.	.	.
	N	1	1	1	1	1	1	1	1	1	1	1	1	1	1	1	1	1	1	1	1	1	1	1	1	1	1	1	1	1	1	1	1	1	1	1	1	1	1	1	1	1	1	1	1	1	1	1	1
Geranyl butanoate	Pearson Correlation	.c	.c	.c	.c	.c	.c	.c	.c	.c	.c	.c	.c	.c	.c	.c	.c	.c	.c	.c	.c	.c	.c	.c	.c	.c	.c	.c	.c	.c	.c	.c	.c	.c	.c	.c	.c	.c	.c	.c	.c	.c	.c	.c	.c	.c	.c	.c	.c
	Sig. (2-tailed)	.	.	.	.	.	.	.	.	.	.	.	.	.	.	.	.	.	.	.	.	.	.	.	.	.	.	.	.	.	.	.	.	.	.	.	.	.	.	.	.	.	.	.	.	.	.	.	.
	N	1	1	1	1	1	1	1	1	1	1	1	1	1	1	1	1	1	1	1	1	1	1	1	1	1	1	1	1	1	1	1	1	1	1	1	1	1	1	1	1	1	1	1	1	1	1	1	1
Spathulenol	Pearson Correlation	-1.000**	-1.000**	-1.000**	-1.000**	-1.000**	.c	-1.000**	-1.000**	-1.000**	-1.000**	-1.000**	1.000**	1.000**	-1.000**	1.000**	1.000**	-1.000**	-1.000**	1.000**	1.000**	1.000**	1.000**	1.000**	-1.000**	-1.000**	-1.000**	-1.000**	-1.000**	1.000**	1.000**	1.000**	-1.000**	-1.000**	-1.000**	-1.000**	-1.000**	-1.000**	-1.000**	-1.000**	-1.000**	-1.000**	-1.000**	-1.000**	-1.000**	-1.000**	-1.000**	-1.000**	-1.000**
	Sig. (2-tailed)	.	.	.	.	.	.	.	.	.	.	.	.	.	.	.	.	.	.	.	.	.	.	.	.	.	.	.	.	.	.	.	.	.	.	.	.	.	.	.	.	.	.	.	.	.	.	.	.
	N	2	2	2	2	2	2	2	2	2	2	2	2	2	2	2	2	2	2	2	2	2	2	2	2	2	2	2	2	2	2	2	2	2	2	2	2	2	2	2	2	2	2	2	2	2	2	2	2
Caryophyllene oxide	Pearson Correlation	-0.292	0.941	0.965	0.854	0.762	-0.583	0.92	-0.496	0.01	-0.007	-0.461	-0.091	-0.673	0.817	-0.798	-0.96	0.826	-0.061	-0.975	-0.955	0.486	-0.016	0.45	0.849	0.817	0.817	0.843	0.742	-0.973	0.419	-0.883	-0.465	-0.371	-0.304	-0.17	0.033	0.033	0.091	-0.099	-0.225	-0.32	-0.471	-0.547	-0.267	-0.213	-0.065	0.201	0.561
	Sig. (2-tailed)	0.811	0.22	0.168	0.348	0.449	0.604	0.257	0.669	0.994	0.996	0.695	0.942	0.53	0.391	0.412	0.181	0.381	0.961	0.142	0.191	0.677	0.99	0.703	0.354	0.391	0.391	0.361	0.468	0.149	0.725	0.311	0.692	0.758	0.803	0.891	0.979	0.979	0.942	0.937	0.856	0.792	0.688	0.632	0.828	0.864	0.958	0.871	0.621
	N	3	3	3	3	3	3	3	3	3	3	3	3	3	3	3	3	3	3	3	3	3	3	3	3	3	3	3	3	3	3	3	3	3	3	3	3	3	3	3	3	3	3	3	3	3	3	3	3
Caryophylla-4(12),8(13)-dien-5-ol	Pearson Correlation	.c	.c	.c	.c	.c	.c	.c	.c	.c	.c	.c	.c	.c	.c	.c	.c	.c	.c	.c	.c	.c	.c	.c	.c	.c	.c	.c	.c	.c	.c	.c	.c	.c	.c	.c	.c	.c	.c	.c	.c	.c	.c	.c	.c	.c	.c	.c	.c
	Sig. (2-tailed)	.	.	.	.	.	.	.	.	.	.	.	.	.	.	.	.	.	.	.	.	.	.	.	.	.	.	.	.	.	.	.	.	.	.	.	.	.	.	.	.	.	.	.	.	.	.	.	.
	N	1	1	1	1	1	1	1	1	1	1	1	1	1	1	1	1	1	1	1	1	1	1	1	1	1	1	1	1	1	1	1	1	1	1	1	1	1	1	1	1	1	1	1	1	1	1	1	1
** Correlation is significant at the 0.01 level (2-tailed).
* Correlation is significant at the 0.05 level (2-tailed).
c Cannot be computed because at least one of the variables is constant.
[truncated: 20 more columns]

## Sheet: Notes per compound
Compound	Note
α-Thujene	α-Thujene only appears in TH-C and therefore CCA could not identify any significant correlations between this compound. However it is likely that this compound favors Cephalonia’a dry summer and lower temperatures.
α-Pinene	α-Pinene showed very high negative correlation with July’s highest temperature, thus the highest the temperatures in July, the lowest the concentration in between the samples.
Camphene	Camphene showed very high negative correlation for the mean diurnal range, high negative correlation for isothermality and annual temperature range, high positive correlation for the precipitation of the wettest quarter and January’s precipitation.
β-Pinene	β-Pinene only appears in traces in TH-C and therefore CCA could not identify any significant correlations for this compound. Similarly to α-Thujene, it is very likely that this compound is favored by dry summers and lower temperatures.
Octen-3-ol	CCA did not identify any significant correlations between Octen-3-ol and the environmental factors. We highlight that Octen-3-ol had the same concentration both in TH-Z and TH-C, so CCA may have not been able to identify any significant correlations because two samples with different environmental conditions had the same compound concentration. It is also likely that the quantity of this compound…
Myrcene	Myrcene showed high negative correlation for the temperature of the warmest month and the highest temperatures of June and August. Myrcene is rather not favored by high temperatures in summer, and probably this is why its highest concentration was in Cephalonia Island.
α-Terpinene	α-Terpinene which only appeared in TH-Z and TH-C showed very high correlation for all environmental factors. The correlation was positive for the mean diurnal range, isothermality, temperature seasonality, precipitation of the driest month and driest quarter, the precipitation from February until September, and the correlation was negative for the rest of the environmental factors. It is highligh…
p-Cymene	p-Cymene similarly to α-Terpinene only appeared in TH-Z and TH-C samples with a considerably higher concentration in TH-C and showed very high correlation for all environmental variables. The correlation was positive for the mean diurnal range, isothermality, temperature seasonality, temperature annual range, annual precipitation, precipitation of the driest month and driest quarter, precipitatio…
Limonene	Limonene only appeared in TH-C and CCA could not identify any significant correlations for the environmental factors with this compound. Similarly, to α-Thujene and β-Pinene, this compound was likely favored by the Cephalonia’s dry summers and low temperatures.
1,8-Cineole	1,8-Cineole only appeared in TH-Z and TH-L and it was not detected in TH-C. This sample also showed very high correlation for all environmental factors and the correlation was negative for the mean diurnal range, isothermality, temperature seasonality, the highest temperature of the warmest month, temperature annual range, annual precipitation, precipitation of the driest month, precipitation of …
γ-Terpinene	γ-Terpinene showed no significant correlation with any of the environmental factors. However it is highlighted that TH-C had significantly higher concentration of this compound which is likely related to Cephalonia’s environment just like α-Thujene, β-Pinene and Limonene.
cis-Sabinene	cis-Sabinene hydrate was only detected in TH-Z and therefore CCA could not correlate it with any environmental factors. It is assumed that this compound is related to low precipitation throughout the year or that it is related to an external factor.
cis-Linalool oxide	cis-Linalool oxide (furanoid) showed very high positive correlation with the highest temperature in May. It is to be highlighted that this compound had considerably lower concentration in TH-C and therefore it is very likely that this compound was not favoed by the local environment or that its presence is related to an external factor.
trans-Linalool oxide	trans-Linalool oxide (furanoid) showed high correlation with the highest temperature in April. Similarly to cis-Linalool oxide (furanoid), this compound had considerably lower concentration in TH-C and therefore it is very likely that this compound was not favored by the local environment or that its presence is related to an external factor.
Linalool	Linalool showed high positive correlation for the mean annual temperature, the mean average temperature in March, April, and September as well as the highest temperature in January and February. This compound showed great differences in the concentrations in between the samples and CCA showed that its presence is mostly linked to other external factors.
Camphor	Camphor was detected in TH-Z and TH-L but we also identified traces of this compound in TH-C. Camphor showed very high correlation for all environmental factors. The correlation was positive for mean diurnal range, isothermality, temperature seasonality, highest temperature in the warmest motnth, lowest temperature in the coldest month, annual temperature range, annual precipitation, precipitatio…
Borneol	Borneol showed high negative correlation for the mean diurnal range, isothermality, high positive correlation for precipitation of the coldest quarter, precipitation in January and October, very high positive correlation for the precipitation of the wettest quarter.
Terpinen-4-ol	Terpinen-4-ol showed high negative correlation for the highest temperature in July and it is also a compound with the highest concentration in TH-C, thus likely related to Cephalonia’s environment, just like α-Thujene, β-Pinene, Limonene and γ-Terpinene.
α-Terpineol	α-Terpineol showed no significant correlation for any of the environmental variables. Since all three samples had relatively similar concentration of α-Terpineol, it is assumed that this compound is likely affected by an external factor.
trans-Dihydro carvone	trans-Dihydro carvone was only detected in TH-C and therefore CCA could not identify any significant correlations with any of the environmental variables. This compound is likely related to Cephalonia’s environment, just like α-Thujene, β-Pinene, Limonene, γ-Terpinene, Terpinen-4-ol, or due to an external factor.
Nerol	Nerol appeared only in TH-C and TH-L and showed very high correlation for all environmental factors except for the lowest temperature (similar for both samples). The correlations were positive for the precipitation of the wettest month, precipitation seasonality, precipitation of wettest quarter, precipitation of coldest quarter, precipitation from October until April and the lowest temperature i…
Neral	Neral, just like Nerol, only appeared in TH-C and TH-L with very high correlation for all environmental factors except for the lowest temperature (similar for both samples). The correlations were negative for the annual precipitation, precipitation of the wettest month, precipitation seasonality, precipitation of wettest quarter, precipitation of coldest quarter, precipitation from October until …
Carvone	Carvone is a compound that only appeared in TH-C and therefore CCA could identify any significant correlations with the environmental factors. Carvone is another compound along with α-Thujene, β-Pinene, Limonene, γ-Terpinene, Terpinen-4-ol and trans-Dihydro carvone that are closely related to Cephalonia’s environment.
Tymoquinone	Thymoquinone is a compound that only appeared in TH-C and therefore CCA could identify any significant correlations with the environmental factors. α-Thujene, β-Pinene, Limonene, γ-Terpinene, Terpinen-4-ol, trans-Dihydro carvone, Carvone that are closely related to Cephalonia’s environment.
Geraniol	Geraniol only appeared in TH-C and TH-L with very high correlation for all environmental factors except for the lowest temperature (similar for both samples). The correlations were negative for the annual precipitation, precipitation of the wettest month, precipitation seasonality, precipitation of wettest quarter, precipitation of coldest quarter, precipitation from October until April. The rest…
Geranial	Geranial only appeared in TH-C and TH-L with very high correlation for all environmental factors except for the lowest temperature (similar for both samples). The correlations were negative for the annual precipitation, precipitation of the wettest month, precipitation seasonality, precipitation of wettest quarter, precipitation of coldest quarter, precipitation from October until April and the l…
Bornyl acetate	Bornyl acetate only appeared in TH-C and TH-L with very high correlation for all environmental factors except for the lowest temperature (similar for both samples). The correlations were positive for the annual precipitation, precipitation of the wettest month, precipitation seasonality, precipitation of wettest quarter, precipitation of coldest quarter, precipitation from October until April and…
Thymol	Thymol’s CCA showed no significant correlations for any of the environmental factors, but its concentration was significantly higher in TH-C, so it was also associated to Cephalonia’s dry summers and low temperatures.
Carvacrol	Carvacrol’s CCA also showed no significant correlations for any of the environmental factors’ concentration was significantly higher in TH-C, so it was also associated to Cephalonia’s dry summers and low temperatures.
Geranyl acetate	Geranyl acetate was only detected in TH-L , so it was not possible for the CCA to identify any significant differences for the environmental factors. This compound is likely related to Lefkada’s precipitation conditions.
β-Caryophyllene	β-Caryophyllene showed high positive correlation for the precipitation of the warmest quarter, August’s average temperature, March and October’s highest temperatures. This compound had high concentrations in TH-Z and TH-L but considerably lower concentration in TH-C.
β-Copaene	β-Copaene was only detected in TH-L, so it was not possible for the CCA to identify any significant differences for the environmental factors. This compound like Geranyl is likely related to Lefkada’s precipitation conditions.
α-Humulene	α-Humulene was only detected in TH-L, so it was not possible for the CCA to identify any significant differences for the environmental factors. This compound is likely related to Lefkada’s precipitation conditions just like Geranyl and β-Copaene.
Germacrene D	Germacrene D showed high positive correlation for the highest temperature in July. This compound had high concentrations in TH-Z and TH-L but considerably lower concentration in TH-C.
Bicyclogermacrene	Bicyclogermacrene was only detected in TH-L sample, so it was not possible for the CCA to identify any significant differences for the environmental factors and similarly Geranyl, β-Copaene, α-Humulene it is suggested that this compound is likely related to Lefkada’s precipitation conditions.
Garanyl isobutanoate	Geranyl isobutanoate was only detected in TH-L, so it was not possible for the CCA to identify any significant differences for the environmental factors, so it was not possible for the CCA to identify any significant differences for the environmental factors and similarly to Geranyl, β-Copaene, α-Humulene and Bicyclogermacrene it is suggested that this compound is likely related to Lefkada’s prec…
Geranyl butanoate	Geranyl butanoate was only detected in TH-L, so it was not possible for the CCA to identify any significant differences for the environmental factors. This is another compound that along with Geranyl, β-Copaene, α-Humulene, Geranyl isobutanoate and Bicyclogermacrene are related to Lefkada’s precipitation conditions.
Spathulenol	Spathulenol showed very high significant correlation for all environmental factors. The correlation was positive for the annual precipitation, precipitation of the wettest month, precipitation seasonality, precipitation of the wettest quarter, precipitation of the coldest quarter, precipitation from November until April and the minimum temperature from November until January. The rest of the envi…
Caryophyllene oxide	Caryophyllene oxide did not show any significant correlations for any of the environmental factors. This compound had high concentrations in TH-Z and TH-L but lower concentration in TH-C. It is assumed that this compound is affected by an external factor.
Caryophylla-4(12),8(13)-dien-5-ol	Caryophylla-4(12),8(13)-dien-5-ol was only detected in TH-L sample, so it was not possible for the CCA to identify any significant differences for the environmental factors and it’s the last compound that along with Geranyl, β-Copaene, α-Humulene, Geranyl isobutanoate, Bicyclogermacrene and Geranyl butanoate are related to Lefkada’s precipitation conditions.

## Sheet: Comments
CCA showed that some minor compounds such as α-Thujene, β-Pinene, Limonene, trans-Dihydro carvone, Carvone, Thymoquinone only appear in TH-C which is likely related to Cephalonia’s dry summer and lower temperatures. TH-L had some unique minor compounds too such as β-Copaene, α-Humulene, Bicyclogermacrene, Geranyl isobutanoate, Geranyl butanoate and Caryophylla-4(12),8(13)-dien-5-ol were only dete…
